# Supplementary material
Source: PubMed Central journal article supplement (PMC2856471)
Supplement: NIHMS119075-supplement-Supplementary_Tables_and_Figures.pdf [file NIHMS119075-supplement-Supplementary_Tables_and_Figures.pdf]

a

Mus musculus

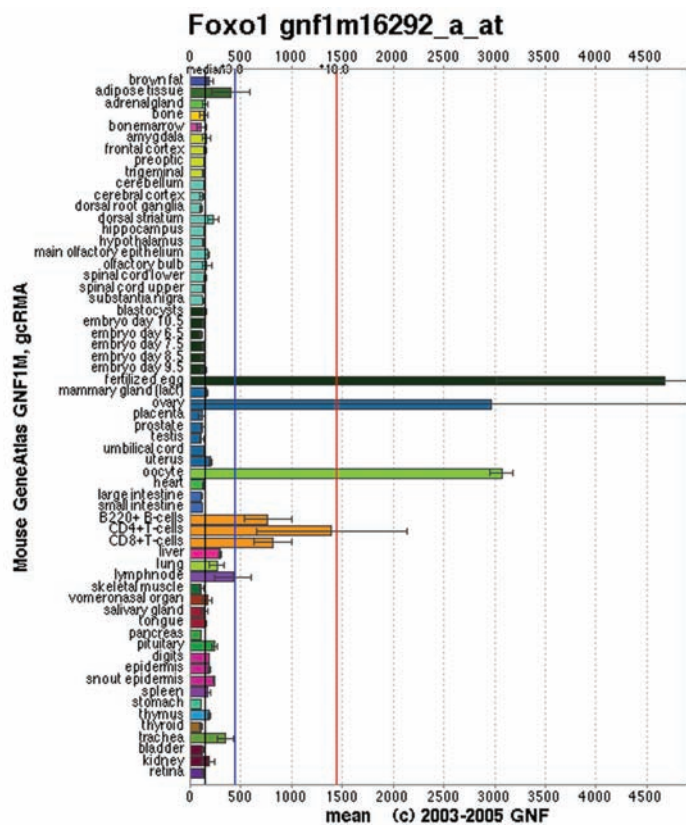

b

Homo sapiens

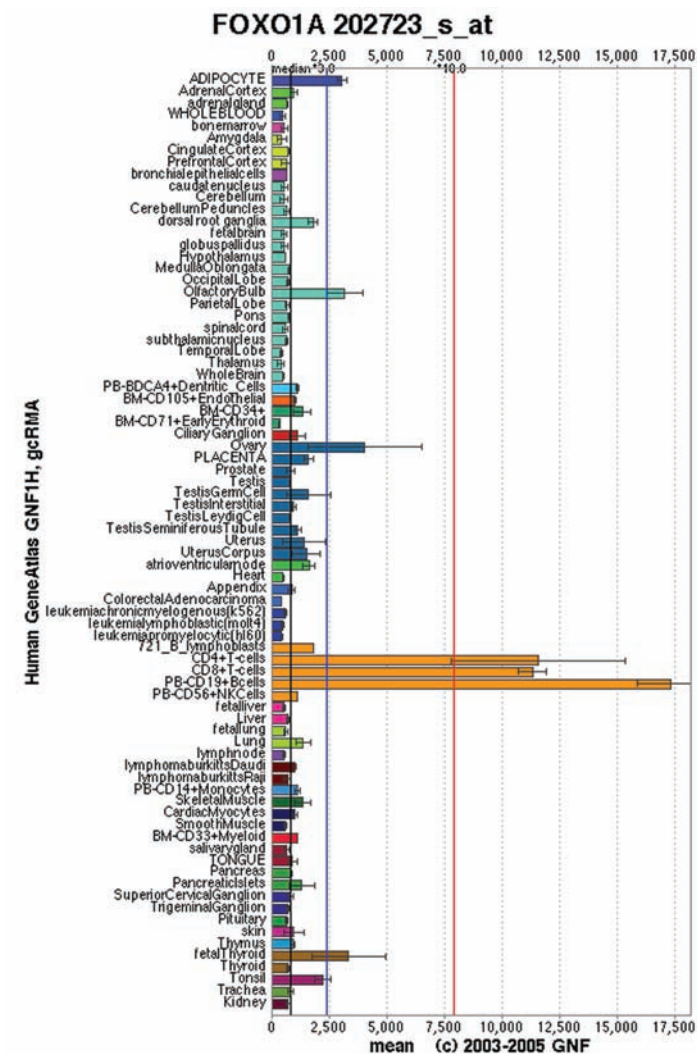

c

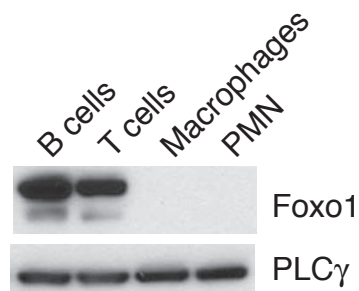

**Supplementary Figure 1** Foxo1 expression pattern is conserved between mouse and human. **(a)** Expression profile of Foxo1 in mouse and **(b)** human tissues and cell subsets according to the Gene Atlas from the Genomics Institute of the Novartis Foundation (GNF) (<http://symatlas.gnf.org/SymAtlas/>). **(c)** Immunoblot analysis of Foxo1 expression in purified cells subsets. T and B cells were isolated from LN and spleen respectively. Macrophages and Polymorphonuclear cells (PMNs) were isolated from the peritoneal cavity of mice elicited with thioglycolate. Representative results from two independent experiments.

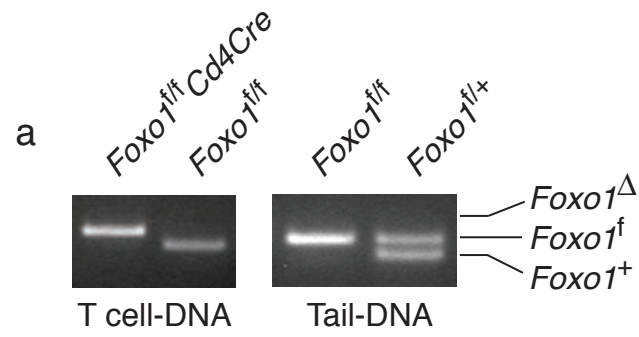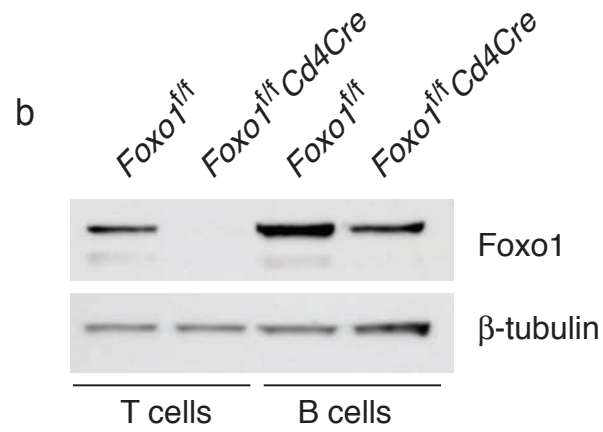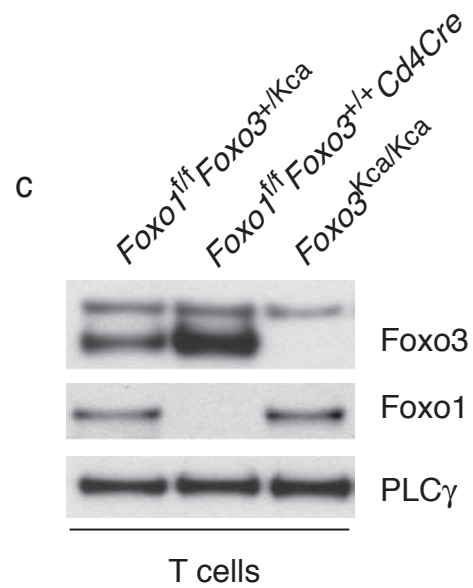

**Supplementary Figure 2** Efficient deletion of Foxo1 in peripheral T cells of *Foxo1<sup>fl/fl</sup>CD4Cre* mice. **(a)** PCR analysis of *Foxo1* genomic deletion in purified LN T cells and tail sample. **(b)** Immunoblot analysis of Foxo1 expression in purified LN T and B cells. **(c)** Immunoblot analysis of Foxo1 and Foxo3 expression in purified LN T cells. Representative results from two to four experiments **(a-c)**.

a

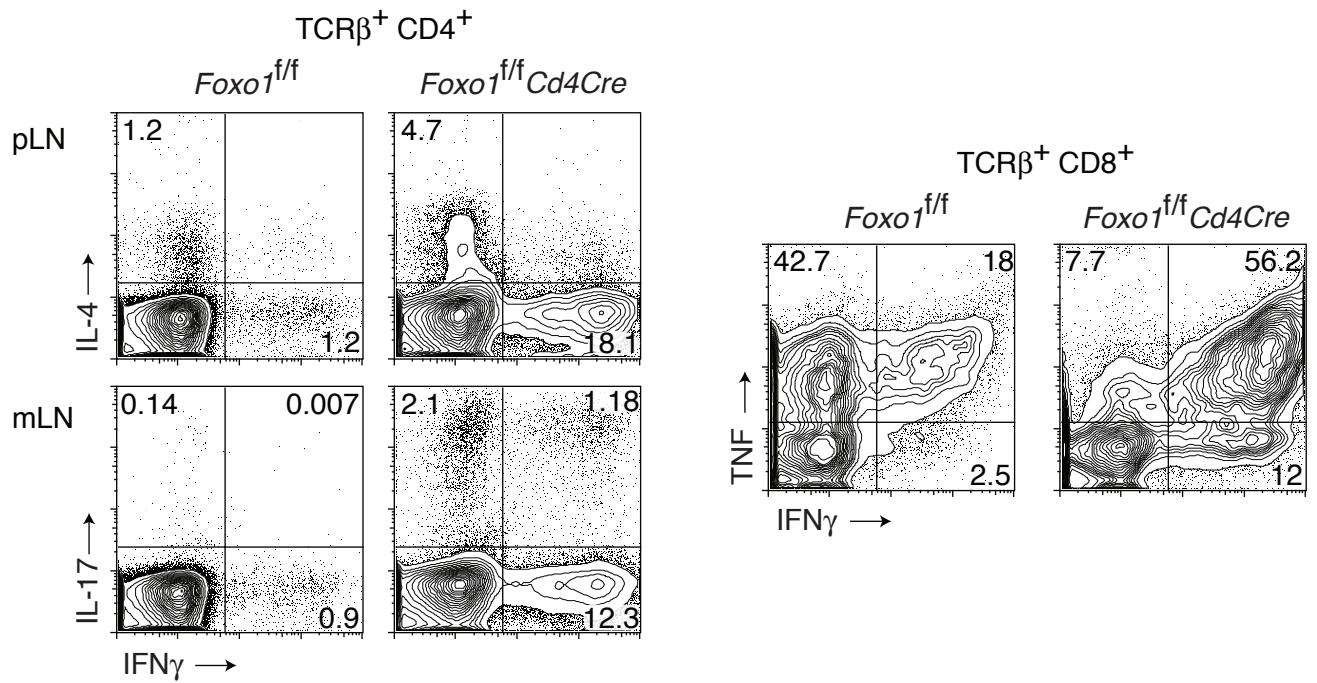

b

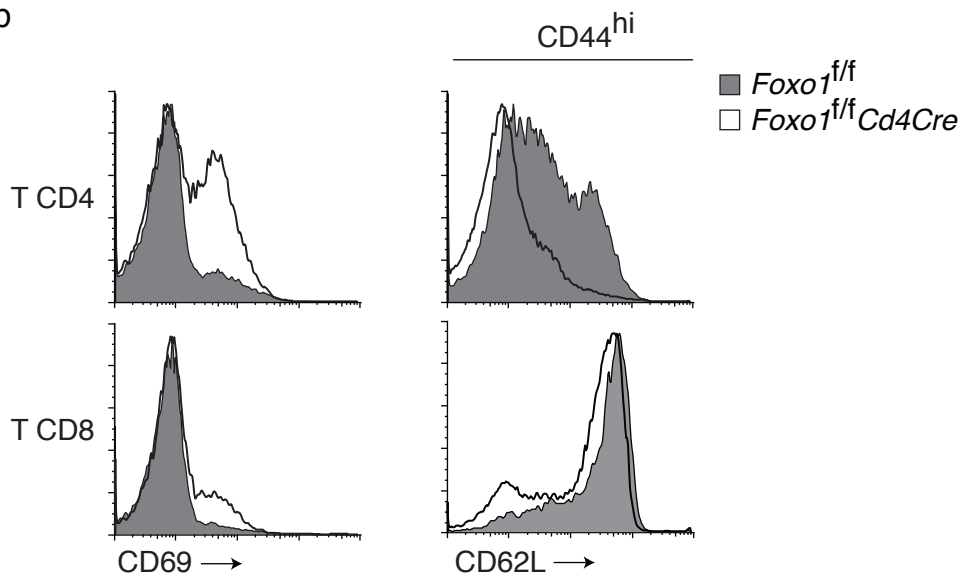

**Supplementary Figure 3** Foxo1 deletion in T cells induces the accumulation of activated and memory phenotype T cells in peripheral lymphoid organs. **(a)** LN cells from individual mice were stimulated for 4.5 h with PMA and ionomycin, in presence of Brefeldin A for the last 3 h. Stimulated cells were then surface stained, fixed, permeabilized and intracellularly-stained for the indicated cytokines. (pLN: peripheral lymph nodes (inguinal, brachial, axillary), mLN: mesenteric lymph nodes). Representative results from  $n = 6$  mice per genotype analyzed in three independent experiments. **(b)** CD69 and CD62L expression on LN  $CD44^{hi}TCR\beta^+ CD4^+$  and  $TCR\beta^+ CD8^+$  cells of 8-12 week-old mice. Representative results for  $n = 8$  mice per staining and per genotype, analyzed in at least three independent experiments.

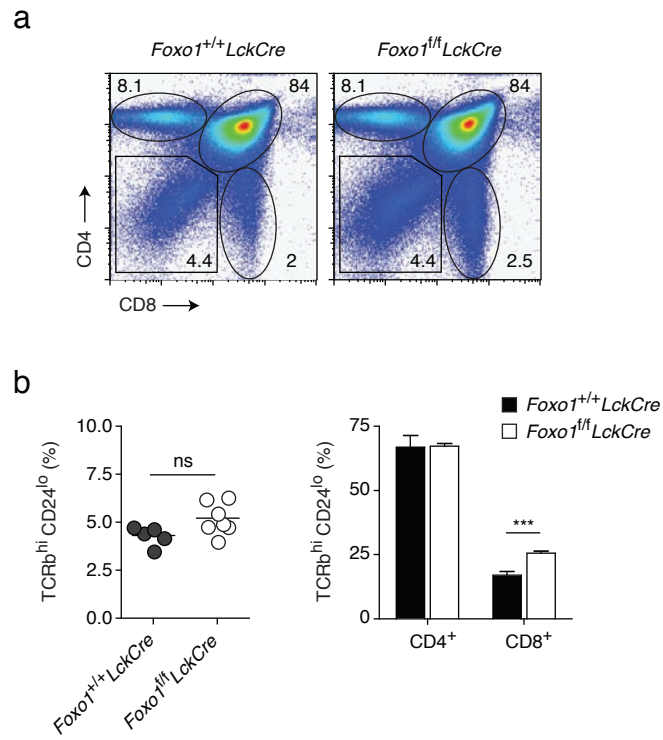

**Supplementary Figure 4** Foxo1 is dispensable for T cell development. **(a)** CD4 and CD8 expression and **(b)** proportion of mature T cells (TCR $\beta^{\text{hi}}$ HSA $^{\text{lo}}$ ) and percentage of CD4 $^{+}$  and CD8 $^{+}$  single positive cells among TCR $\beta^{\text{hi}}$ HSA $^{\text{lo}}$  cells (mean $\pm$ s.e.m.) on thymocytes of 8-week-old mice. Each circle indicates one mouse. Data represent  $n = 5$  *Foxo1* $^{+/+}$  and  $n = 7$  *Foxo1* $^{\text{ff}}$  mice, analyzed in two independent experiments (**a** and **b**) (\*\*\*, $p < 0.0001$ ; ns: not significant).



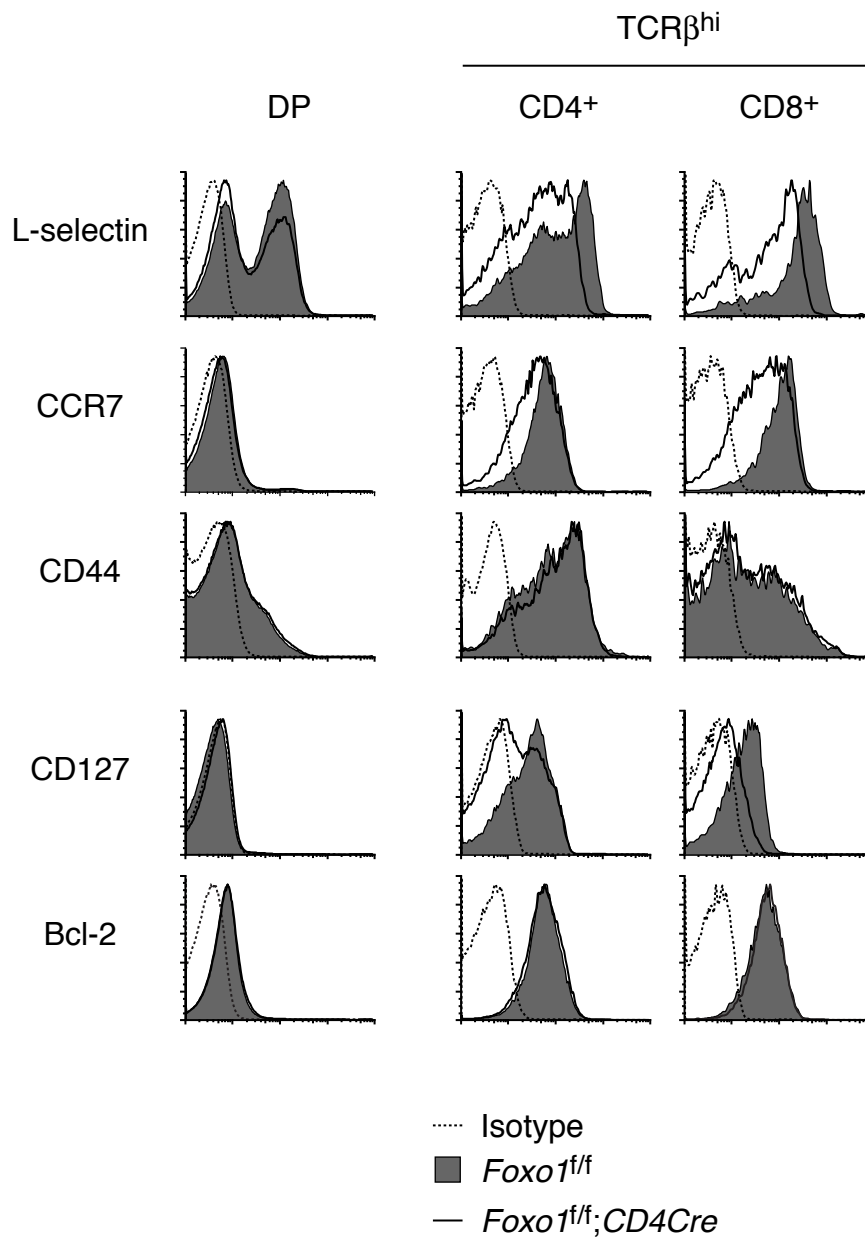

**Supplementary Figure 5** Impaired expression of L-selectin, Ccr7 and IL-7R $\alpha$  on thymic mature T cells. Representative results of  $n = 6$  mice per staining and per genotype, analyzed in at least two independent experiments.

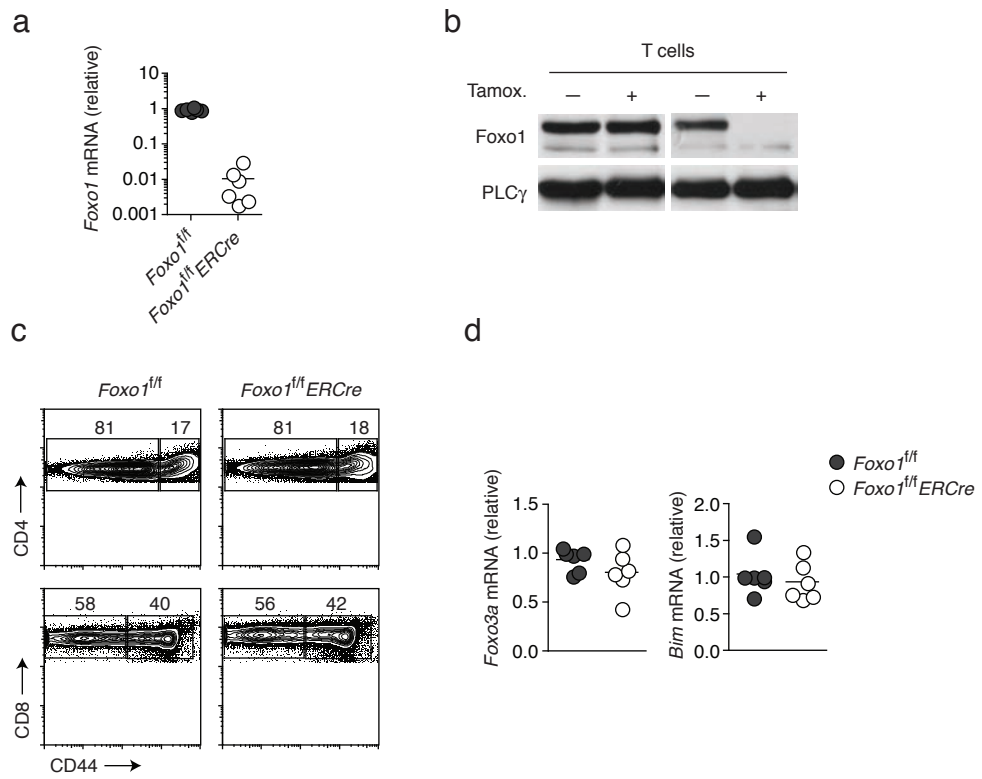

**Supplementary Figure 6** Short term tamoxifen treatment induces efficient deletion of *Foxo1* and does not alter the ratio of naïve to activated-memory phenotype T cells in *Foxo1<sup>fl/fl</sup>ERCre* mice. **(a-d)** *Foxo1<sup>fl/fl</sup>ERCre* mice and littermates were treated for 5 days with tamoxifen and rested for 5 days. **(a)** QPCR analysis of *Foxo1* mRNA expression, normalized to *Hprt* mRNA, in purified LN T cells. **(b)** Immunoblot analysis of Foxo1 expression in purified LN T cells. Representative results of three independent experiments. **(c)** CD44 expression by LN TCR $\beta^+$  CD4 $^+$  and TCR $\beta^+$  CD8 $^+$  cells. **(d)** QPCR analysis of *Foxo3* and *Bim* mRNA expression, normalized to *Hprt* mRNA, in purified LN T cells. Each circle indicates one mouse (**a** and **d**). Data represent  $n = 6$  mice analyzed in at least two independent experiments (**a**, **c** and **d**) (\*\*\*, $p < 0.0001$ ; ns: not significant).

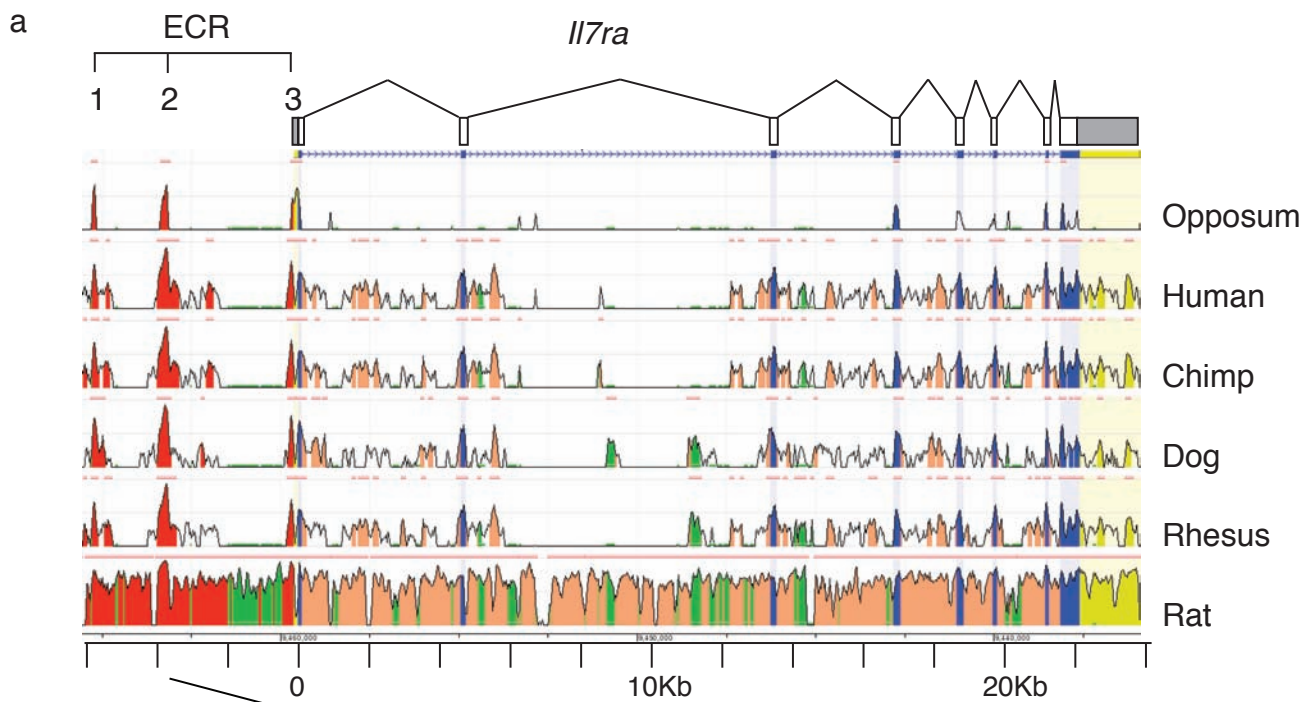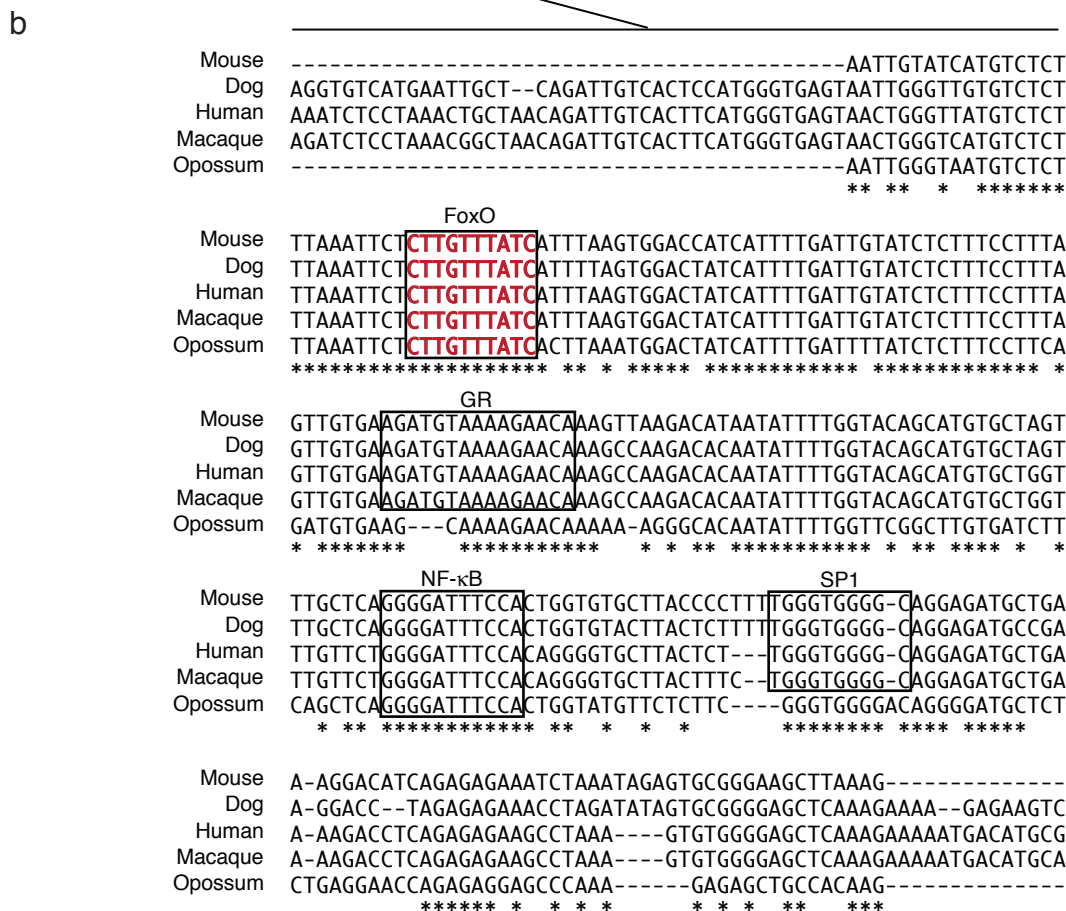

**Supplementary Figure 7** Genomic sequence alignment of the *I17ra* enhancer. **(a)** Comparative alignment of the *I17ra* loci from NCBI decode.org (<http://www.dcode.org/>). **(b)** The aligned sequences from ECR2 showing the conserved Foxo, glucocorticoid receptor (GR), and NF $\kappa$ B binding sites.

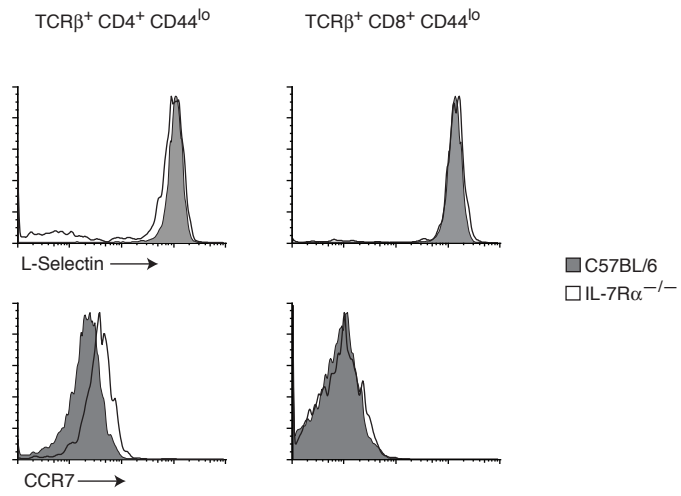

**Supplementary Figure 8** IL-7R $\alpha$  is not required for L-selectin and Ccr7 expression on naïve T cells. L-selectin and Ccr7 expression on spleen CD44<sup>lo</sup> CD4<sup>+</sup> and CD8<sup>+</sup> T cells from wildtype and *Il7ra*<sup>-/-</sup> mice. Representative results of  $n = 4$  mice per genotype.



a

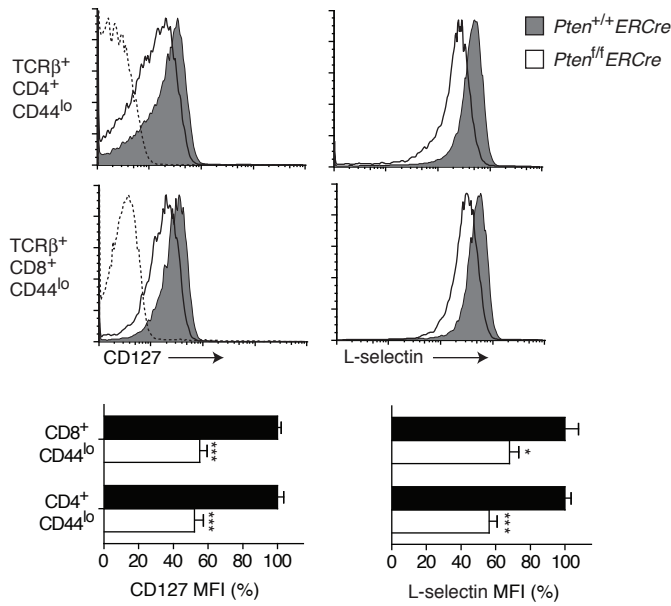

b

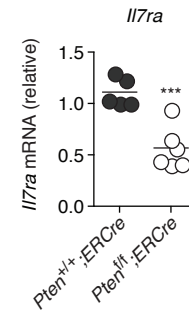

c

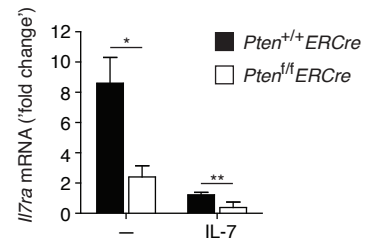

**Supplementary Figure 9** PTEN-mediated control of IL-7R $\alpha$  and L-selectin on naïve T cells. **(a-c)** Mice were treated with tamoxifen for 5 days and rested for 5 days. **(a)** Quantification of CD127 and L-selectin expression on LN CD44<sup>lo</sup> TCR $\beta$ <sup>+</sup> CD4<sup>+</sup> and TCR $\beta$ <sup>+</sup> CD8<sup>+</sup> cells (mean  $\pm$  s.e.m.). Data represent n=7 *Pten*<sup>+/+</sup> and n=9 *Pten*<sup>ff</sup> mice (CD127); and n=3 *PTEN*<sup>+/+</sup> and n=6 *PTEN*<sup>ff</sup> mice (L-selectin), analyzed in two independent experiments. **(b)** QPCR analysis of *Il7ra* mRNA expression, normalized to *Hprt* mRNA, in purified LN T cells. Each circle indicates one mouse. **(c)** Purified LN T cells were cultured overnight in media supplemented or not with IL-7 (10 ng/mL) and *Il7ra* mRNA was quantified by QPCR. Results are presented as fold change (mean  $\pm$  s.d. of triplicate culture) relative to the value obtained for freshly isolated T cells set to 1. Representative results of two independent experiments (\*, p<0.05; \*\*, p<0.01; \*\*\*, p<0.0001).

| <b>Supplementary Table I – Antibodies</b> |                         |                             |
|-------------------------------------------|-------------------------|-----------------------------|
| Antibody specificity                      | Clone Identifier        | Source                      |
| TCRbeta                                   | H57-597                 | eBioscience                 |
| CD44                                      | IM7                     | eBioscience                 |
| CD4                                       | GK1.5                   | eBioscience                 |
| CD8                                       | 53-6.7                  | BioLegend                   |
| CD24                                      | 30-F1                   | BD Biosciences              |
| L-selectin (CD62L)                        | MEL-14                  | eBioscience                 |
| CCR7                                      | 4B12                    | eBioscience                 |
| CD45.1                                    | A20                     | eBioscience                 |
| CD45.2                                    | 104                     | eBioscience                 |
| Bcl-2                                     | 10C4                    | Santa Cruz Biotechnology    |
| IL-7R (CD127)                             | A7R34                   | eBioscience                 |
| gC (CD132)                                | 4G3                     | BD Biosciences              |
| b-tubulin                                 | AA2                     | Upstate-Millipore           |
| PLCg                                      | B-6-4                   | Santa Cruz Biotechnology    |
| IL-4                                      | 11B11                   | eBioscience                 |
| IL-17                                     | TC11-18H10              | BD Biosciences              |
| IFNg                                      | XMG1.2                  | eBioscience                 |
| TNF                                       | MP6-XT22                | eBioscience                 |
| CD69                                      | H1.2F3                  | eBioscience                 |
| Foxo1                                     | 76E10                   | Cell Signaling              |
| Foxo3                                     | Rabbit anti-mouse Foxo3 | Gift, A. Brunet, Stanford U |

**Supplementary Table II Primers used to quantitate gene expression**

| Primer sequence            | Gene            |
|----------------------------|-----------------|
| tcattatgccgaggattgga       | <i>Hprt</i> S   |
| cagagggccacaatgtgatg       | <i>Hprt</i> AS  |
| tgtcaggctaagagttagttagca   | <i>Foxo1</i> S  |
| gggtgaaggcatctttg          | <i>Foxo1</i> AS |
| aagtggaaatgccaggat         | <i>Il7ra</i> S  |
| ttgacttccatccactcca        | <i>Il7ra</i> AS |
| ggttactgaataccaagggaacttt  | <i>IL2rg</i> S  |
| tggcagaaccggtcactgta       | <i>IL2rg</i> AS |
| ctaaaggcgcacatctgcgta      | <i>Klf2</i> S   |
| tagtggcgggtaagctcgt        | <i>Klf2</i> AS  |
| tgatttctacagccccaga        | <i>Ccr7</i> S   |
| gcacacctggaaaatgacaa       | <i>Ccr7</i> AS  |
| ccaagtgtgctttcaactgttc     | <i>Sell</i> S   |
| aaaggctcacactggaccac       | <i>Sell</i> AS  |
| ggagacgagttcaacgaaactt     | <i>Bim</i> S    |
| aacagttgtaagataaccatttgagg | <i>Bim</i> AS   |
| aagcaggcctcatctcaaag       | <i>Foxo3</i> S  |
| cgtcagttgagggtctgc         | <i>Foxo3</i> AS |

**Supplementary Table III Primers used for Chromatin Immunoprecipitation (ChIP)**

| Primer sequence      | <i>Il7ra</i> gene region |
|----------------------|--------------------------|
| acctcatcagcctttcatgg | <i>Il7ra</i> -ECR2 S     |
| atcccctgagcaaactagca | <i>Il7ra</i> -ECR2 AS    |
| agcaaaaggattgctgctgt | <i>Il7ra</i> -ECR1 S     |
| aagtgtggattttggcttg  | <i>Il7ra</i> -ECR1 AS    |
| tcttgggtgttgatgtggaa | <i>Il7ra</i> -ECR3 S     |
| gtgccaggcttctttcata  | <i>Il7ra</i> -ECR3 AS    |
